# Supplementary material for: Development and External Validation of Web-Based Models to Predict the Prognosis of Remnant Gastric Cancer after Surgery: A Multicenter Study
Source: Hindawi journal article supplement (doi:10.1155/2019/6012826), 2019-04-10
Supplement: f1 [file 6012826.f1.pdf]

**Supplemental Table 1.** Correlation between the 7th edition and 8th edition AJCC staging systems.

|                  |      | AJCC 8th staging |          |          |           |           |           |          | Total       |
|------------------|------|------------------|----------|----------|-----------|-----------|-----------|----------|-------------|
|                  |      | Ia               | Ib       | IIa      | IIb       | IIIa      | IIIb      | IIIc     |             |
| AJCC 7th staging | Ia   | 31               | 0        | 0        | 0         | 0         | 0         | 0        | 31(12.3%)   |
|                  | Ib   | 0                | 20       | 0        | 0         | 0         | 0         | 0        | 20(7.9%)    |
|                  | IIa  | 0                | 0        | 23       | 0         | 0         | 0         | 0        | 23(9.1%)    |
|                  | IIb  | 0                | 0        | 0        | 48        | 0         | 0         | 0        | 48(19.0%)   |
|                  | IIIa | 0                | 0        | 0        | 0         | 35        | 0         | 0        | 35(13.8%)   |
|                  | IIIb | 0                | 0        | 0        | 0         | 33        | 19        | 1        | 53(20.9%)   |
|                  | IIIc | 0                | 0        | 0        | 0         | 0         | 25        | 18       | 43(17.0%)   |
| Total            |      | 31(12.3%)        | 20(7.9%) | 23(9.1%) | 48(19.0%) | 68(26.9%) | 44(17.4%) | 19(7.5%) | 253(100.0%) |

**Supplemental Table 2.** Correlation between the 7th edition AJCC staging system and the TRM staging system

|                  |      | TRM staging |          |          |           |           |           |           | Total       |
|------------------|------|-------------|----------|----------|-----------|-----------|-----------|-----------|-------------|
|                  |      | Ia          | Ib       | IIa      | IIb       | IIIa      | IIIb      | IIIc      |             |
| AJCC 7th staging | Ia   | 31          | 0        | 0        | 0         | 0         | 0         | 0         | 31(12.3%)   |
|                  | Ib   | 0           | 20       | 0        | 0         | 0         | 0         | 0         | 20(7.9%)    |
|                  | IIa  | 0           | 1        | 21       | 1         | 0         | 0         | 0         | 23(9.1%)    |
|                  | IIb  | 0           | 0        | 1        | 45        | 2         | 0         | 0         | 48(19.0%)   |
|                  | IIIa | 0           | 0        | 0        | 11        | 23        | 1         | 0         | 35(13.8%)   |
|                  | IIIb | 0           | 0        | 0        | 1         | 19        | 28        | 5         | 53(20.9%)   |
|                  | IIIc | 0           | 0        | 0        | 0         | 1         | 13        | 29        | 43(17.0%)   |
| Total            |      | 31(12.3%)   | 21(8.3%) | 22(8.7%) | 58(22.9%) | 45(17.8%) | 42(16.6%) | 34(13.4%) | 253(100.0%) |

**Supplemental Table 3.** Comparison of the prognostic performances of the 3 studied staging systems and the web-based prognostic model based on (A) a retrieved LN count  $\leq 15$ ; (B) a retrieved LN count  $> 15$ .

| <b>(A) Retrieved LN count <math>\leq 15</math></b> |                        |                        |                     |                        |
|----------------------------------------------------|------------------------|------------------------|---------------------|------------------------|
| <b>Overall Survival</b>                            | <b>AJCC7th staging</b> | <b>AJCC8th staging</b> | <b>TRM staging</b>  | <b>Huang OS model</b>  |
| Harrell's C statistic*                             | 0.741(0.684-0.800)     | 0.710(0.647-0.772)     | 0.742 (0.687-0.797) | 0.775(0.718-0.832)     |
| P value**                                          |                        | 0.120                  | 0.979               | 0.044                  |
| AIC†                                               | 519.71                 | 524.45                 | 516.82              | 507.85                 |
| Relative likelihood††                              |                        | 0.093                  | 0.236               | 0.003                  |
| Likelihood ratio chi-square‡                       | 31.87                  | 27.13                  | 34.76               | 51.73                  |
| <b>Disease-Specific Survival</b>                   | <b>AJCC7th staging</b> | <b>AJCC8th staging</b> | <b>TRM staging</b>  | <b>Huang DSS model</b> |
| Harrell's C statistic*                             | 0.751(0.714-0.827)     | 0.731(0.670-0.793)     | 0.754 (0.721-0.827) | 0.790(0.731-0.850)     |
| P value**                                          |                        | 0.148                  | 0.812               | 0.039                  |
| AIC†                                               | 443.78                 | 450.26                 | 439.54              | 428.77                 |
| Relative likelihood††                              |                        | 0.039                  | 0.120               | 0.001                  |
| Likelihood ratio chi-square‡                       | 42.35                  | 35.87                  | 46.6                | 65.36                  |
| <b>Disease-Free Survival</b>                       | <b>AJCC7th staging</b> | <b>AJCC8th staging</b> | <b>TRM staging</b>  | <b>Huang DFS model</b> |
| Harrell's C statistic*                             | 0.739(0.685-0.794)     | 0.717(0.660-0.774)     | 0.743 (0.691-0.795) | 0.754(0.698-0.810)     |
| P value**                                          |                        | 0.295                  | 0.839               | 0.602                  |
| AIC†                                               | 544.64                 | 551.16                 | 542.02              | 538.32                 |
| Relative likelihood††                              |                        | 0.038                  | 0.270               | 0.042                  |
| Likelihood ratio chi-square‡                       | 39.97                  | 33.45                  | 42.59               | 54.29                  |
| <b>(B) Retrieved LN count <math>&gt; 15</math></b> |                        |                        |                     |                        |
| <b>Overall Survival</b>                            | <b>AJCC7th staging</b> | <b>AJCC8th staging</b> | <b>TRM staging</b>  | <b>Huang OS model</b>  |
| Harrell's C statistic*                             | 0.748(0.714-0.823)     | 0.759(0.724-0.835)     | 0.769 (0.735-0.844) | 0.785(0.721-0.848)     |
| P value**                                          |                        | 0.650                  | 0.319               | 0.041                  |
| AIC†                                               | 393.71                 | 390.04                 | 388.05              | 382.67                 |
| Relative likelihood††                              |                        | 0.160                  | 16.945              | 0.004                  |
| Likelihood ratio chi-square‡                       | 38.38                  | 40.05                  | 37.04               | 46.38                  |
| <b>Disease-Specific Survival</b>                   | <b>AJCC7th staging</b> | <b>AJCC8th staging</b> | <b>TRM staging</b>  | <b>Huang DSS model</b> |
| Harrell's C statistic*                             | 0.754(0.697-0.811)     | 0.753(0.694-0.812)     | 0.756 (0.697-0.815) | 0.777(0.705-0.849)     |
| P value**                                          |                        | 0.924                  | 0.748               | 0.109                  |
| AIC†                                               | 308.1                  | 307.98                 | 307.7               | 302.54                 |
| Relative likelihood††                              |                        | 0.942                  | 0.819               | 0.062                  |
| Likelihood ratio chi-square‡                       | 28.06                  | 28.68                  | 29.46               | 32.02                  |
| <b>Disease-Free Survival</b>                       | <b>AJCC7th staging</b> | <b>AJCC8th staging</b> | <b>TRM staging</b>  | <b>Huang DFS model</b> |
| Harrell's C statistic*                             | 0.734(0.671-0.797)     | 0.728(0.663-0.793)     | 0.735 (0.668-0.802) | 0.762(0.692-0.831)     |
| P value**                                          |                        | 0.812                  | 0.957               | 0.126                  |
| AIC†                                               | 416                    | 417.17                 | 417.91              | 408.71                 |
| Relative likelihood††                              |                        | 0.557                  | 0.385               | 0.026                  |
| Likelihood ratio chi-square‡                       | 34.95                  | 33.79                  | 33.04               | 41.22                  |

AIC, Akaike information criterion.

\* A higher Harrell's C statistics indicates higher discriminative ability; \*\* P value (compare with AJCC7th staging system); † Smaller AIC values indicate better optimistic prognostic stratification; ‡ A higher likelihood ratio chi-square score means better homogeneity; ‡ ‡ The relative likelihood could be interpreted as a p value for the comparison of both AIC (compare with AJCC7th staging system)

**Supplemental Table 4.** Clinicopathologic description of remnant gastric cancer patients in the validation cohort.

| <b>Variable</b>                                      | <b>No. of Patients</b> | <b>%</b>       |
|------------------------------------------------------|------------------------|----------------|
| <b>Age(years) (Mean <math>\pm</math> SD)</b>         |                        | 69.7 $\pm$ 8.2 |
| >65                                                  | 17                     | 34.7           |
| $\leq$ 65                                            | 32                     | 65.3           |
| <b>Sex</b>                                           |                        |                |
| Male                                                 | 42                     | 85.7           |
| Female                                               | 7                      | 14.3           |
| <b>Interval (year)</b>                               |                        |                |
| $\leq$ 5                                             | 7                      | 14.3           |
| 5-10                                                 | 5                      | 10.2           |
| >10                                                  | 37                     | 75.5           |
| <b>Previous disease</b>                              |                        |                |
| Benign                                               | 36                     | 73.5           |
| Malignant                                            | 13                     | 26.5           |
| <b>Size (cm) (Mean <math>\pm</math> SD)</b>          |                        | 5.0 $\pm$ 2.9  |
| $\leq$ 2                                             | 6                      | 12.2           |
| 2-5                                                  | 27                     | 55.1           |
| >5                                                   | 16                     | 32.7           |
| <b>T-stage</b>                                       |                        |                |
| T1                                                   | 11                     | 22.4           |
| T2                                                   | 2                      | 4.1            |
| T3                                                   | 2                      | 4.1            |
| T4a                                                  | 32                     | 65.3           |
| T4b                                                  | 2                      | 4.1            |
| <b>N-stage</b>                                       |                        |                |
| N0                                                   | 23                     | 46.9           |
| N1                                                   | 4                      | 8.2            |
| N2                                                   | 12                     | 24.5           |
| N3                                                   | 10                     | 20.4           |
| <b>Positive LN count (Mean <math>\pm</math> SD)</b>  |                        | 3.2 $\pm$ 4.0  |
| <b>Retrieved LN count (Mean <math>\pm</math> SD)</b> |                        | 14.0 $\pm$ 9.0 |
| $\leq$ 15                                            | 28                     | 57.1           |
| >15                                                  | 21                     | 42.9           |
| <b>LNR</b>                                           |                        |                |
| 0                                                    | 23                     | 46.9           |
| >0,0.3                                               | 10                     | 20.4           |
| >0.3,0.6                                             | 7                      | 14.3           |
| >0.6                                                 | 9                      | 18.4           |

|                              |    |      |
|------------------------------|----|------|
| <b>TRM staging</b>           |    |      |
| Ia                           | 11 | 22.4 |
| Ib                           | 2  | 4.1  |
| IIa                          | 1  | 2.0  |
| IIb                          | 10 | 20.4 |
| IIIa                         | 9  | 18.4 |
| IIIb                         | 7  | 14.3 |
| IIIc                         | 9  | 18.4 |
| <b>AJCC7th staging</b>       |    |      |
| Ia                           | 11 | 22.4 |
| Ib                           | 2  | 4.1  |
| IIa                          | 1  | 2.0  |
| IIb                          | 9  | 18.4 |
| IIIa                         | 4  | 8.2  |
| IIIb                         | 10 | 20.4 |
| IIIc                         | 12 | 24.5 |
| <b>AJCC8th staging</b>       |    |      |
| Ia                           | 11 | 22.4 |
| Ib                           | 2  | 4.1  |
| IIa                          | 1  | 2.0  |
| IIb                          | 9  | 18.4 |
| IIIa                         | 11 | 22.4 |
| IIIb                         | 3  | 6.1  |
| IIIc                         | 12 | 24.5 |
| <b>Adjuvant Chemotherapy</b> |    |      |
| No                           | 27 | 55.1 |
| Yes                          | 22 | 44.9 |

**Abbreviations:** SD, standard deviation; LN, Lymph node; ; Interval, Interval between gastrectomy and remnant gastric cancer.

**Supplemental Table 5.** Comparison of the prognostic performances of the 3 studied staging systems and the web-based prognostic model in the validation cohort.

| <b>Overall Survival</b>             | <b>AJCC7th staging</b> | <b>AJCC8th staging</b> | <b>TRM staging</b>  | <b>Huang OS model</b>  |
|-------------------------------------|------------------------|------------------------|---------------------|------------------------|
| <b>Harrell's C statistic*</b>       | 0.721(0.594-0.847)     | 0.707(0.572-0.842)     | 0.723 (0.584-0.863) | 0.780(0.668-0.893)     |
| <b>P value**</b>                    |                        | 0.619                  | 0.927               | 0.043                  |
| <b>AIC†</b>                         | 127.95                 | 131.05                 | 131.2               | 121.75                 |
| <b>Relative likelihood††</b>        |                        | 0.212                  | 0.197               | 0.045                  |
| <b>Likelihood ratio chi-square‡</b> | 16.54                  | 13.44                  | 13.29               | 25.73                  |
| <b>Disease-Specific Survival</b>    | <b>AJCC7th staging</b> | <b>AJCC8th staging</b> | <b>TRM staging</b>  | <b>Huang DSS model</b> |
| <b>Harrell's C statistic*</b>       | 0.763(0.618-0.909)     | 0.745(0.599-0.891)     | 0.755 (0.603-0.907) | 0.822(0.701-0.942)     |
| <b>P value**</b>                    |                        | 0.398                  | 0.790               | 0.047                  |
| <b>AIC†</b>                         | 107.75                 | 110.32                 | 110.31              | 101.75                 |
| <b>Relative likelihood††</b>        |                        | 0.277                  | 0.278               | 0.050                  |
| <b>Likelihood ratio chi-square‡</b> | 18.95                  | 16.38                  | 16.39               | 26.71                  |
| <b>Disease-Free Survival</b>        | <b>AJCC7th staging</b> | <b>AJCC8th staging</b> | <b>TRM staging</b>  | <b>Huang DFS model</b> |
| <b>Harrell's C statistic*</b>       | 0.671(0.524-0.818)     | 0.649(0.499-0.798)     | 0.665 (0.513-0.817) | 0.700(0.551-0.848)     |
| <b>P value**</b>                    |                        | 0.251                  | 0.834               | 0.486                  |
| <b>AIC†</b>                         | 144.77                 | 145.33                 | 145.64              | 140.57                 |
| <b>Relative likelihood††</b>        |                        | 0.756                  | 0.647               | 0.122                  |
| <b>Likelihood ratio chi-square‡</b> | 12.36                  | 11.8                   | 11.49               | 17.13                  |

AIC, Akaike information criterion.

\* A higher Harrell's C statistics indicates higher discriminative ability

\*\* P value (compare with AJCC7th staging system)

† Smaller AIC values indicate better optimistic prognostic stratification.

‡ A higher likelihood ratio chi-square score means better homogeneity.

‡ ‡ The relative likelihood could be interpreted as a p value for the comparison of both AIC (compare with AJCC7th staging system)

**Supplemental Table 6.** Five-year postoperative survival rates in remnant gastric cancer between initial surgery for benign disease and initial surgery for malignant disease in previous studies

| Author, year                 | Initially benign | Initially malignant | p value         |
|------------------------------|------------------|---------------------|-----------------|
| Takeda, 1996 <sup>40</sup>   | 32.1 % (n = 28)  | 61.5 % (n = 13)     | <0.05           |
| Hu, 2009 <sup>41</sup>       | 38.1 % (n = 47)  | 10.4 % (n = 47)     | <0.05           |
| Namikawa, 2010 <sup>42</sup> | 75.0 % (n = 10)  | 51.4 % (n = 24)     | Not significant |
| Tokunaga, 2013 <sup>43</sup> | 49.0 % (n = 79)  | 59.3 % (n = 68)     | Not significant |
| Takeno, 2014 <sup>44</sup>   | 50.0 % (n = 14)  | 37.0 % (n = 58)     | <0.05           |
| Total                        | 45.2 % (n = 180) | 41.7 % (n = 210)    | Not significant |

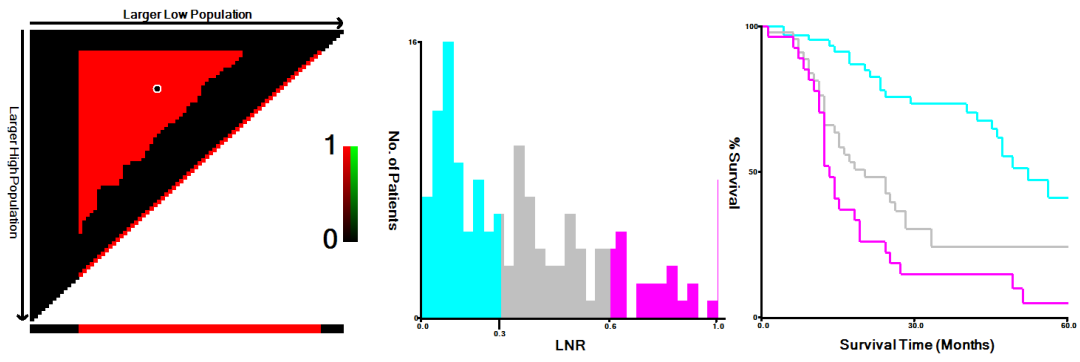

**Supplemental Fig. 1** X-tile analysis identifying the best cutoff points for LNR; LNR, metastatic lymph node ratio.



**A**

| AJCC7th staging | N0   | N1   | N2   | N3   |
|-----------------|------|------|------|------|
| T1              | IA   | IB   | IIA  | IIB  |
| T2              | IB   | IIA  | IIB  | IIIA |
| T3              | IIA  | IIB  | IIIA | IIIB |
| T4a             | IIB  | IIIA | IIIB | IIIC |
| T4b             | IIIB | IIIB | IIIC | IIIC |

**B**

| TRM staging | Nr0  | Nr1  | Nr2  | Nr3  |
|-------------|------|------|------|------|
| T1          | IA   | IB   | IIA  | IIB  |
| T2          | IB   | IIA  | IIB  | IIIA |
| T3          | IIA  | IIB  | IIIA | IIIB |
| T4a         | IIB  | IIIA | IIIB | IIIC |
| T4b         | IIIB | IIIB | IIIC | IIIC |

**C**

| AJCC8th staging | N0   | N1   | N2   | N3a  | N3b  |
|-----------------|------|------|------|------|------|
| T1              | IA   | IB   | IIA  | IIB  | IIIA |
| T2              | IB   | IIA  | IIB  | IIIA | IIIB |
| T3              | IIA  | IIB  | IIIA | IIIB | IIIC |
| T4a             | IIB  | IIIA | IIIA | IIIB | IIIC |
| T4b             | IIIA | IIIB | IIIB | IIIC | IIIC |

**Supplemental Fig. 2** (A) The AJCC 7th staging system, (B) the TRM staging system, (C) the AJCC 8th staging system

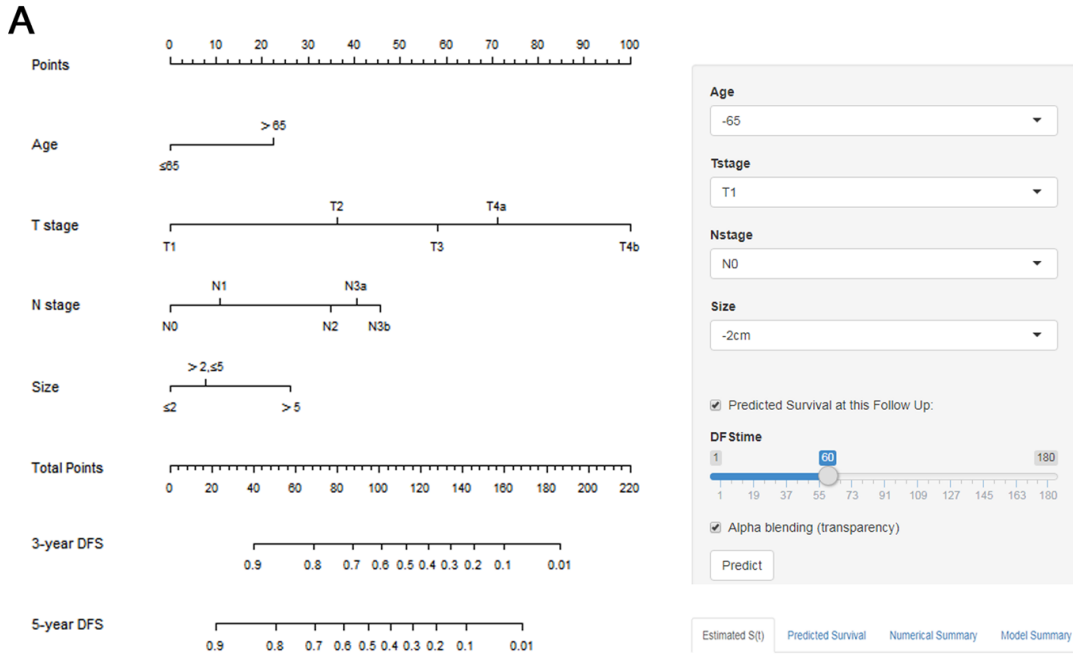

<https://zhongqing.shinyapps.io/HuangDFSmodel/>

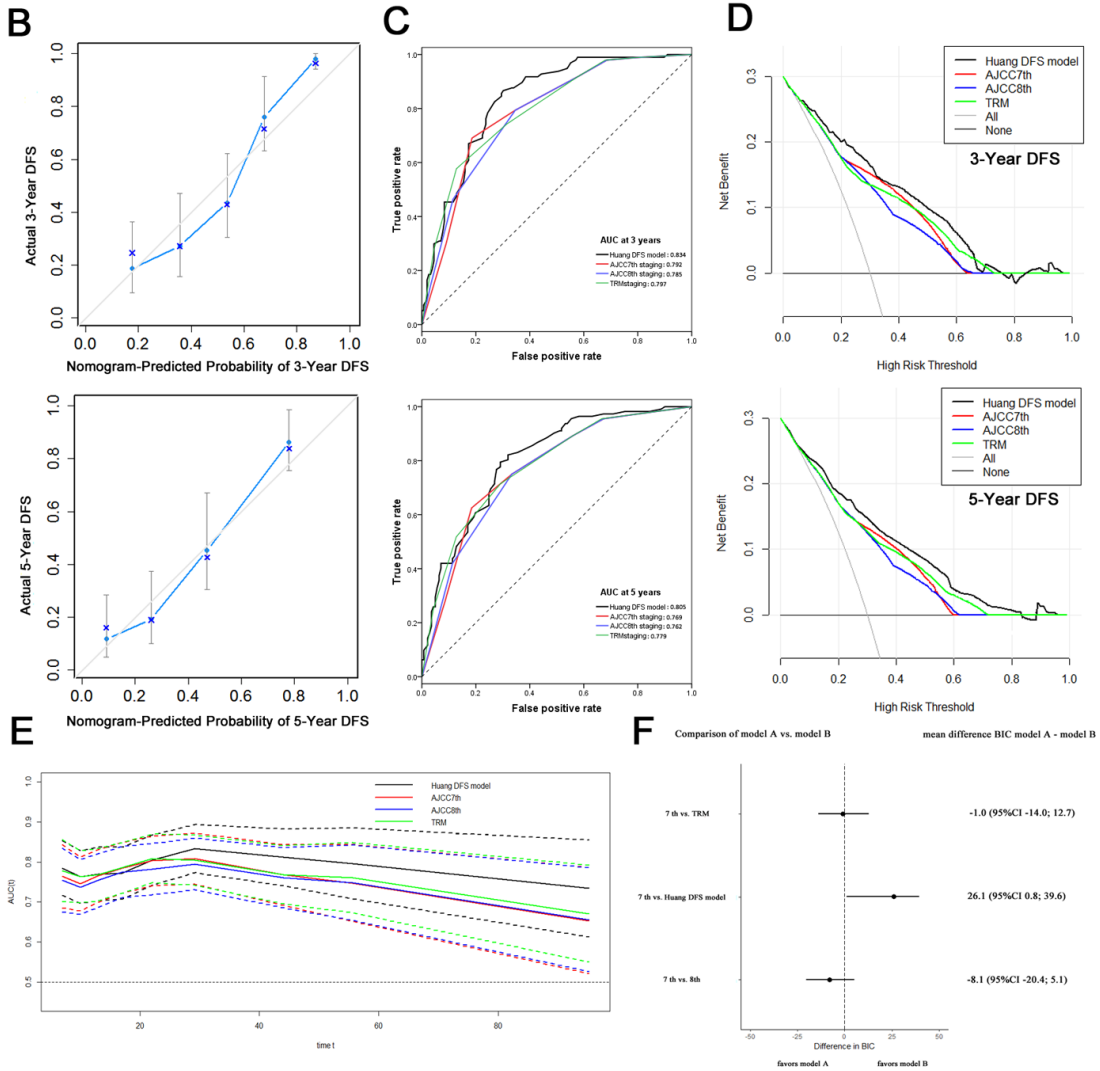

**Supplemental Fig. 3** (A) The Huang DFS model (a web-based nomogram) for predicting the 3- and 5-year DFS rates for RGC. The nomogram is used by summing the points identified on the point scale for each variable. The total points projected on the bottom scales indicate the probability of 3- and 5-year DFS. The nomogram is available at [https://zhongqing.shinyapps.io/Huang DFS model/](https://zhongqing.shinyapps.io/Huang%20DFS%20model/). To use this nomogram, choose the value for each variable and the predicted survival time, then press the “predict” button. (B) A calibration plot of the web-based nomogram for 3 years and 5 years. (C) The receiver operating characteristic (ROC) curve for the 3- and 5-year disease-specific probability of the web-based nomogram and the 3 studied staging systems. (D) DCA for 3-year DFS and 5-year DFS after surgery. The y-axis measures the net benefit. (E) Time-dependent ROC curves for the web-based nomogram and the 3 studied staging systems. The x-axis represents the year after surgery, and the y-axis represents the estimated area under the ROC curve for survival at the time of interest. (F) The results from a bootstrap analysis (1,000 samples): mean differences in Bayesian information criteria (BIC) with 95% confidence limits for the web-based nomogram and the 3 studied staging systems.

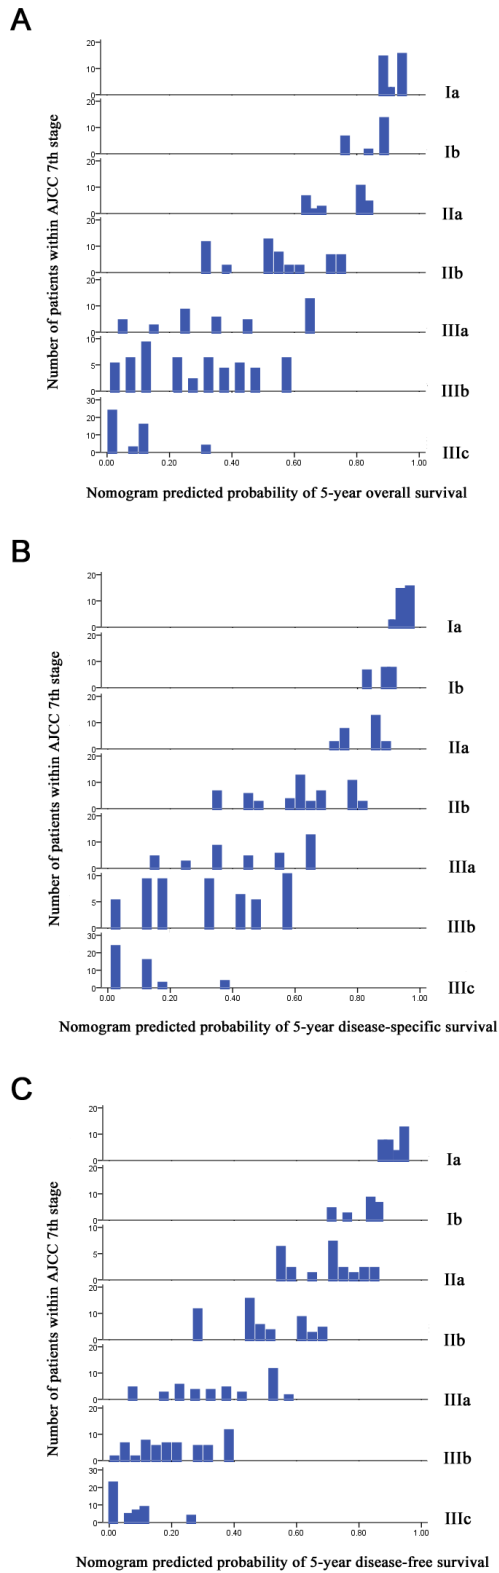

**Supplemental Fig. 4** Distribution of the nomogram predictions within each AJCC 7th stage grouping. The nomogram's improved predictive ability is illustrated by the heterogeneity of the nomogram predictions. (A) overall survival, (B) disease-specific survival, (C) disease-free survival.

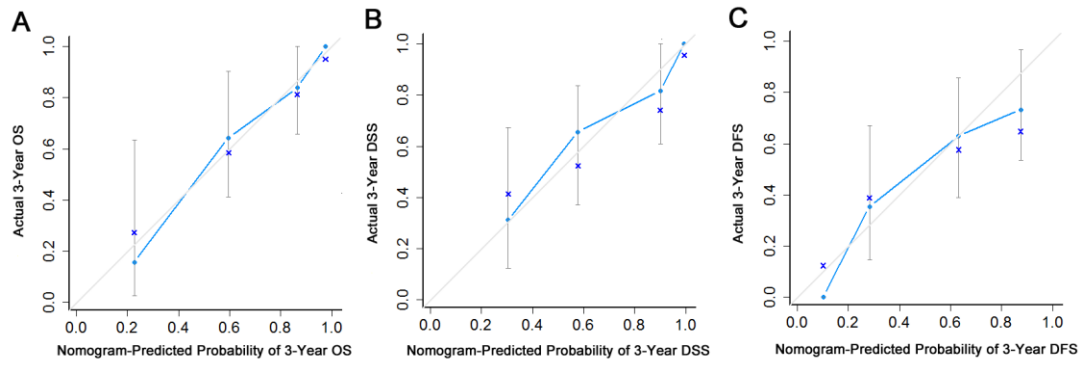

**Supplemental Fig. 5** Nomogram calibration plots using the external validation cohort. (A) overall survival, (B) disease-specific survival, (C) disease-free survival.
